# Supplementary material
Source: Springer Nature journal article supplement (https://www.springermedizin.de/resource/supplementary/12955_2007_412_MOESM4_ESM.pdf/9560338)

**Factor 2 after 2nd eye surgery  
(Glasses independence)**

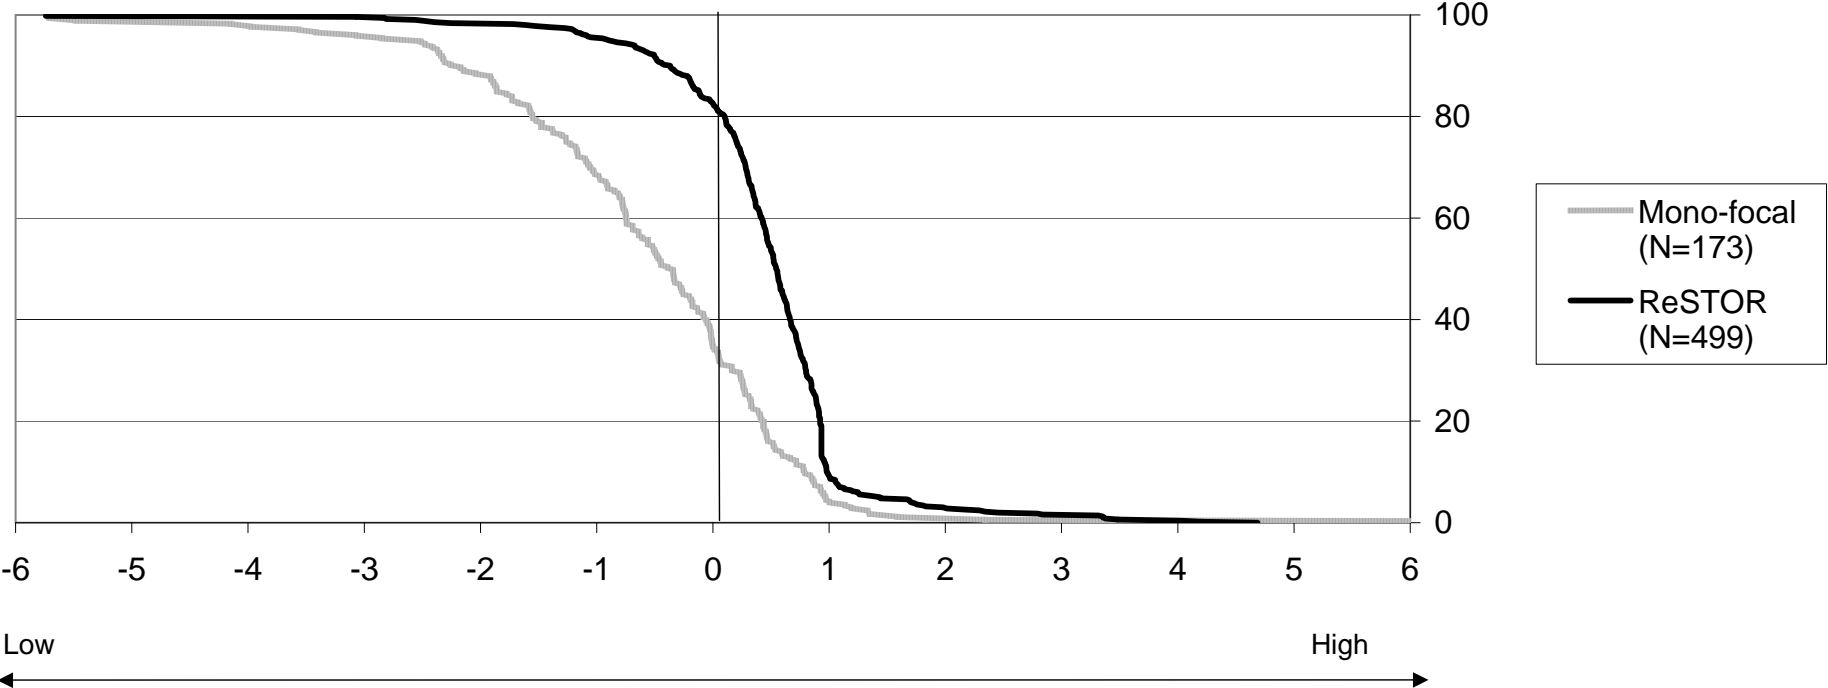

Low

High

Supplement: MOESM4 [file 9560338]
